# Supplementary material
Source: PubMed Central journal article supplement (PMC6752264)

A

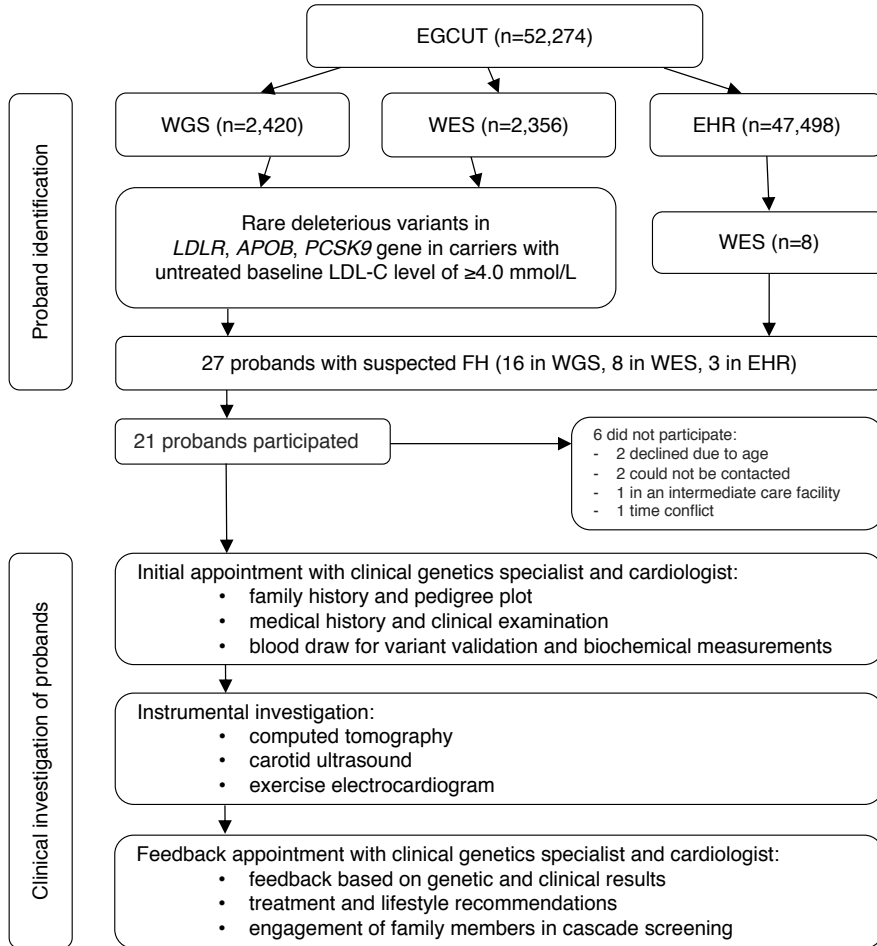

B

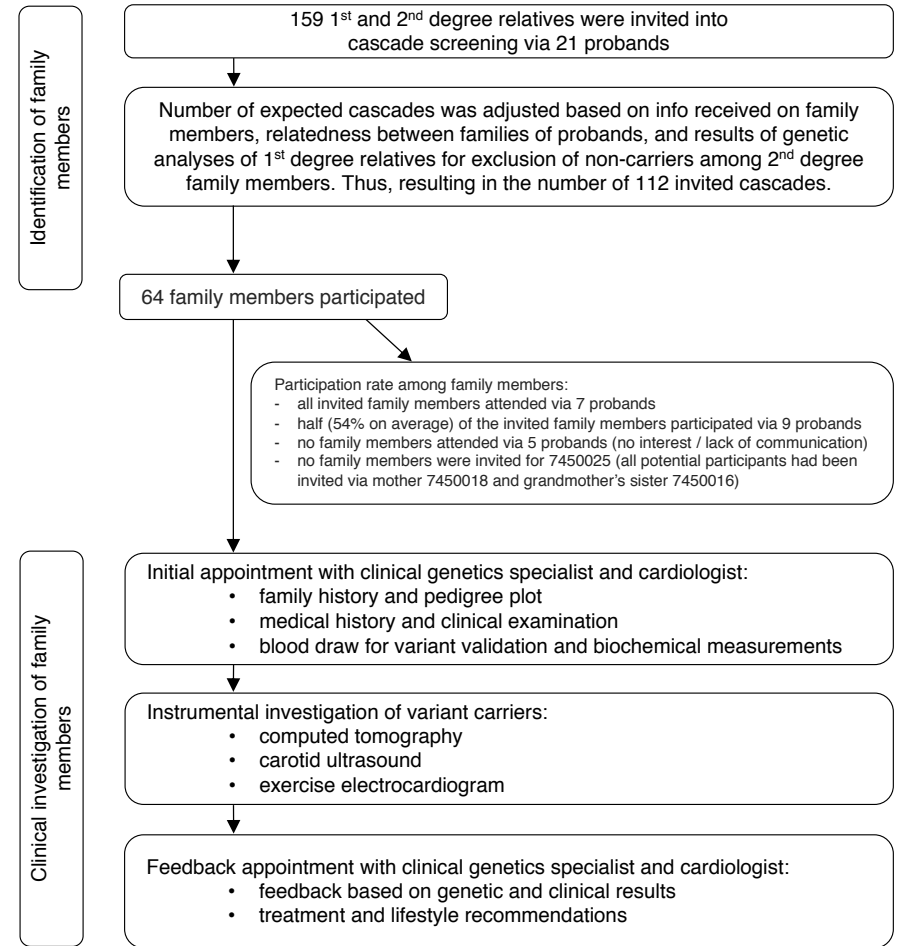

Supplement: 41436_2018_311_MOESM1_ESM.pdf [file 41436_2018_311_MOESM1_ESM.pdf]
