# Supplementary material
Source: PubMed Central journal article supplement (PMC6752264)
Supplement: 41436_2018_311_MOESM4_ESM.pdf [file 41436_2018_311_MOESM4_ESM.pdf]

Table S2. Dutch Lipid Clinic Network criteria.

|                      | Criteria                                                                                                          | Points    |
|----------------------|-------------------------------------------------------------------------------------------------------------------|-----------|
| Family history       | First-degree relative with known premature (men: <55 years; women: <60 years) coronary or vascular disease and/or | 1         |
|                      | First-degree relative with known LDL-C above the 95th percentile                                                  |           |
|                      | First-degree relative with tendinous xanthomata and/or arcus cornealis and/or                                     |           |
| Clinical history     | Children <18 years of age with LDL-C above the 95th percentile                                                    | 2         |
|                      | Premature (men: <55 years; women: <60 years) coronary artery disease                                              | 2         |
|                      | Premature (men: <55 years; women: <60 years) cerebral or peripheral vascular disease                              | 1         |
| Physical examination | Tendinous xanthomata                                                                                              | 6         |
|                      | Arcus cornealis before age 45 years                                                                               | 4         |
| LDL-C levels         | ≥ 8.5 mmol/L                                                                                                      | 8         |
|                      | 6.5–8.4 mmol/L                                                                                                    | 5         |
|                      | 5.0–6.4 mmol/L                                                                                                    | 3         |
|                      | 4.0–4.9 mmol/L                                                                                                    | 1         |
| DNA analysis         | Mutation in the <i>LDLR</i> , <i>APOB</i> or <i>PCSK9</i> gene                                                    | 8         |
|                      | Definite FH                                                                                                       | Score >8  |
|                      | Probable FH                                                                                                       | Score 6-8 |
|                      | Possible FH                                                                                                       | Score 3-5 |
|                      | Unlikely                                                                                                          | Score <3  |

FH - familial hypercholesterolemia; LDL-C - LDL cholesterol
