# Supplementary material
Source: PubMed Central journal article supplement (PMC6752264)
Supplement: 41436_2018_311_MOESM5_ESM.pdf [file 41436_2018_311_MOESM5_ESM.pdf]

Table S3. Identified FH-associated variants.

| Gene         | Chr | GRCh37/hg19 |             | Variant info (exon; codon; protein) | AC_EST* | Polyphen2         | HdivPred    | SIFT        | Condel | PhyloP | CADD            | MutationTaster                               | Clinvar | gnomAD_total** | EXAC*** | SISU****                       | UCL LDLR gene variant database; |                   | Variant categoration after study based on |  |
|--------------|-----|-------------|-------------|-------------------------------------|---------|-------------------|-------------|-------------|--------|--------|-----------------|----------------------------------------------|---------|----------------|---------|--------------------------------|---------------------------------|-------------------|-------------------------------------------|--|
|              |     | position    | rs-number   |                                     |         |                   |             |             |        |        |                 |                                              |         |                |         |                                | ACSG class                      | HGMD              | ACMG criteria                             |  |
| <i>APOB</i>  | 2   | 21229160    | rs5742904   | 26/29; c.10580G>A; p.Arg3527Gln     | AC=11   | probably damaging | NA          | Neutral     | 4.569  | 29.4   | disease causing | Conflicting interpretations of pathogenicity | AC=79   | AC=28          | AC=0    | NA                             | 1                               | likely pathogenic |                                           |  |
| <i>LDLR</i>  | 19  | 11215925    | rs774723292 | 4/18; c.343C>T; p.Arg115Cys         | AC=1    | probably damaging | Deleterious | Deleterious | 3.927  | 33     | disease causing | Conflicting interpretations of pathogenicity | AC=7    | AC=4           | AC=0    | ACGS=4                         | 1                               | VUS               |                                           |  |
| <i>LDLR</i>  | 19  | 11216225    | rs764042910 | 4/18; c.643C>T; p.Arg215Cys         | AC=1    | probably damaging | Deleterious | Deleterious | 0.619  | 28.1   | disease causing | Pathogenic                                   | AC=15   | AC=2           | AC=0    | NA; c.643C>A, p.Arg215Ser      | 0                               | likely pathogenic |                                           |  |
| <i>LDLR</i>  | 19  | 11217295    | NA          | 5/18; c.749A>G; p.His250Arg         | AC=2    | probably damaging | Deleterious | Deleterious | 2.036  | 22.9   | disease causing | NA                                           | AC=1    | AC=0           | AC=0    | NA; c.750T>C; p.His250=        | 0                               | VUS               |                                           |  |
| <i>LDLR</i>  | 19  | 11221373    | rs761954844 | 7/18; c.986G>A; p.Cys329Tyr         | AC=5    | probably damaging | Deleterious | Deleterious | 5.767  | 25.7   | disease causing | Conflicting interpretations of pathogenicity | AC=7    | AC=0           | AC=0    | ACGS=4                         | 1                               | likely pathogenic |                                           |  |
| <i>LDLR</i>  | 19  | 11223954    | rs766474188 | 9/18; c.1187G>C; p.Gly396Ala        | AC=1    | probably damaging | Deleterious | Deleterious | 2.462  | 23.2   | disease causing | NA                                           | AC=3    | AC=4           | AC=1    | NA; c.1186G>A, p.Gly396Ser     | 0                               | likely pathogenic |                                           |  |
| <i>LDLR</i>  | 19  | 11223969    | rs121908038 | 9/18; c.1202T>A; p.Leu401His        | AC=2    | probably damaging | Deleterious | Deleterious | 4.546  | 25.5   | disease causing | Pathogenic/Likely pathogenic                 | AC=0    | AC=0           | AC=0    | ACGS=4                         | 1                               | likely pathogenic |                                           |  |
| <i>LDLR</i>  | 19  | 11224058    | rs28942079  | 9/18; c.1291G>T; p.Ala431Ser        | AC=1    | benign            | Deleterious | Deleterious | 5.506  | 30     | disease causing | NA; p.Ala431Thr, p.Ala431Pro                 | AC=1    | AC=0           | AC=0    | NA; c.1291G>A, p.Ala431Thr     | 0                               | likely pathogenic |                                           |  |
| <i>LDLR</i>  | 19  | 11224074    | rs779732323 | 9/18; c.1307T>C; p.Val436Ala        | AC=1    | benign            | Deleterious | Neutral     | 4.546  | 26.5   | disease causing | Conflicting interpretations of pathogenicity | AC=5    | AC=1           | AC=0    | ACGS=3                         | 1                               | VUS               |                                           |  |
| <i>LDLR</i>  | 19  | 11230820    | rs754536745 | 13/18; c.1898G>A; p.Arg633His       | AC=1    | probably damaging | Deleterious | Deleterious | 3.138  | 27.5   | disease causing | Conflicting interpretations of pathogenicity | AC=6    | AC=2           | AC=0    | ACGS=4; c.1897C>T, p.Arg633Cys | 1                               | likely pathogenic |                                           |  |
| <i>PCSK9</i> | 1   | 55523076    | rs148562777 | 7/12; c.1069C>T; p.Arg357Cys        | AC=1    | probably damaging | Deleterious | Deleterious | 1.589  | 34     | disease causing | NA; p.Arg357His                              | AC=43   | AC=18          | AC=0    | NA                             | 0                               | likely pathogenic |                                           |  |

of unknown significance

\*Query based on 2,240 whole-genome sequences and 2,356 whole-exome sequences.

\*\*Query based on 123,136 exome sequences and 15,496 whole-genome sequences at <http://gnomad.broadinstitute.org/>\*\*\*Query based on 60,706 exome sequences at <http://exac.broadinstitute.org/>\*\*\*\*Query based on 10,490 exome sequences at <http://www.sisuproject.fi/>
