# Supplementary material
Source: PubMed Central journal article supplement (PMC6752264)
Supplement: 41436_2018_311_MOESM6_ESM.pdf [file 41436_2018_311_MOESM6_ESM.pdf]

Table S4. Baseline characteristics of probands.

| IID     | Gene  | Variant info             | BirthYear | Sex    | HC in EHR    | CHD in EHR            | Statin prescription<br>in EHR | Baseline statin<br>use | VAP TC<br>mg/dl | VAP LDLR<br>mg/dl | VAP LDLR transformed<br>mmol/L | CTC<br>mmol/L | C LDL<br>mmol/L | Baseline LDL-C | Baseline LDL-C mmol/L | Participation |
|---------|-------|--------------------------|-----------|--------|--------------|-----------------------|-------------------------------|------------------------|-----------------|-------------------|--------------------------------|---------------|-----------------|----------------|-----------------------|---------------|
|         |       |                          |           |        |              |                       |                               |                        |                 |                   |                                |               |                 | mmol/L         | statin-adjusted       |               |
| 7450001 | APOB  | c.10580G>A; p.Arg3527Gln | 1983      | Male   | E78.0        | 0                     | 1                             | 0                      | 331             | 212               | 5.9335                         | NA            | NA              | 5.93           | 5.93                  | 1             |
| 7450002 | APOB  | c.10580G>A; p.Arg3527Gln | 1961      | Male   | E78.0        | 0                     | 1                             | 0                      | 276             | 175               | 4.9933                         | NA            | NA              | 4.99           | 4.99                  | 1             |
| 7450004 | APOB  | c.10580G>A; p.Arg3527Gln | 1936      | Male   | E78.0        | I21 I25.1 I25.9 Z95.1 | 1                             | 0                      | 293             | 196               | 5.5269                         | 7.4           | 5.07            | 5.07           | 5.07                  | 1             |
| 7450009 | APOB  | c.10580G>A; p.Arg3527Gln | 1962      | Male   | E78.0        | 0                     | 1                             | 0                      | NA              | NA                | NA                             | 7.6           | 4.8             | 4.8            | 4.8                   | 1             |
| 7450015 | APOB  | c.10580G>A; p.Arg3527Gln | 1969      | Female | E78.5        | 0                     | 1                             | 0                      | NA              | NA                | NA                             | 3.9           | 2.58            | 2.58           | 2.58                  | 1             |
| 7450016 | APOB  | c.10580G>A; p.Arg3527Gln | 1937      | Female | E78.0        | 0                     | 1                             | 1                      | 394             | 23                | 6.5180                         | NA            | NA              | 6.52           | 9.31                  | 1             |
| 7450018 | APOB  | c.10580G>A; p.Arg3527Gln | 1961      | Female | E78.0_2 (FH) | 0                     | 0                             | 0                      | NA              | NA                | NA                             | 10.0          | 7.55            | 7.55           | 7.55                  | 1             |
| 7450023 | APOB  | c.10580G>A; p.Arg3527Gln | 1975      | Female | E78          | 0                     | 0                             | 0                      | NA              | NA                | NA                             | 8.0           | 6.05            | 6.05           | 6.05                  | 1             |
| 7450025 | APOB  | c.10580G>A; p.Arg3527Gln | 1984      | Female | E78.2        | 0                     | 1                             | 1                      | 414             | 247               | 6.8229                         | 9.3           | 7.03            | 7.03           | 10.04                 | 1             |
| 7450028 | APOB  | c.10580G>A; p.Arg3527Gln | 1969      | Male   | E78.0        | 0                     | 0                             | 0                      | NA              | NA                | NA                             | 7.5           | 5.90            | 5.9            | 5.9                   | 1             |
| 7484000 | APOB  | c.10580G>A; p.Arg3527Gln | 1969      | Female | 0            | 0                     | 0                             | 0                      | NA              | NA                | NA                             | 8.7           | 6.57            | 6.57           | 6.57                  | 0             |
| 7450013 | LDLR  | c.343C>T; p.Arg115Cys    | 1983      | Female | 0            | 0                     | 0                             | 0                      | NA              | NA                | NA                             | 4.6           | 2.89            | 2.89           | 2.89                  | 1             |
| 7450026 | LDLR  | c.643C>T; p.Arg215Cys    | 1952      | Male   | E78          | 0                     | 1                             | 0                      | 314             | 162               | 4.6629                         | NA            | NA              | 4.66           | 4.66                  | 1             |
| 7450032 | LDLR  | c.749A>G; p.His250Arg    | 1975      | Male   | 0            | 0                     | 0                             | 0                      | NA              | NA                | NA                             | 5.5           | 3.67            | 3.67           | 3.67                  | 1             |
| 7482000 | LDLR  | c.749A>G; p.His250Arg    | 1933      | Female | E78.0        | I24.9 I20 I25         | 1                             | 1                      | 219             | 112               | 3.3924                         | 5.1           | 3.23            | 3.23           | 4.61                  | 0             |
| 7450003 | LDLR  | c.986G>A; p.Cys329Tyr    | 1967      | Female | E78.0_2 (FH) | 0                     | 1                             | 1                      | NA              | NA                | NA                             | 5.7           | 4.21            | 4.21           | 6.01                  | 1             |
| 7450006 | LDLR  | c.986G>A; p.Cys329Tyr    | 1988      | Male   | E78.0        | 0                     | 1                             | 1                      | 319             | 211               | 5.9081                         | NA            | NA              | 5.91           | 8.44                  | 1             |
| 7450019 | LDLR  | c.986G>A; p.Cys329Tyr    | 1962      | Female | E78.0_2 (FH) | 0                     | 1                             | 1                      | NA              | NA                | NA                             | 7.58          | 3.3             | 3.3            | 4.71                  | 1             |
| 7481200 | LDLR  | c.986G>A; p.Cys329Tyr    | 1967      | Female | E78.0        | 0                     | 1                             | 0                      | NA              | NA                | NA                             | 9.2           | 7.26            | 7.26           | 7.26                  | 0             |
| 7483000 | LDLR  | c.986G>A; p.Cys329Tyr    | 1975      | Female | E78.0        | 0                     | 1                             | 0                      | 278             | 189               | NA                             | 6.4           | 5.15            | 5.15           | 5.15                  | 0             |
| 7450020 | LDLR  | c.1187G>C; p.Gly396Ala   | 1977      | Male   | 0            | 0                     | 0                             | 0                      | 225             | 134               | 3.9514                         | 5.8           | 3.74            | 3.74           | 3.74                  | 1             |
| 7450029 | LDLR  | c.1202T>A; p.Leu401His   | 1985      | Male   | 0            | 0                     | 0                             | 0                      | NA              | NA                | NA                             | 6.5           | 5.22            | 5.22           | 5.22                  | 1             |
| 7481300 | LDLR  | c.1202T>A; p.Leu401His   | 1978      | Male   | 0            | 0                     | 0                             | 0                      | NA              | NA                | NA                             | 7.6           | 6.10            | 6.1            | 6.1                   | 0             |
| 7450007 | LDLR  | c.1291G>T; p.Ala431Ser   | 1979      | Male   | E78.0        | 0                     | 1                             | 0                      | 320             | 190               | 5.3744                         | 8.3           | 5.76            | 5.76           | 5.76                  | 1             |
| 7481000 | LDLR  | c.1307T>C; p.Val436Ala   | 1934      | Female | E78.0        | I20.8 I21 I25.0 Z95.5 | 1                             | 0                      | 325             | 182               | 5.1712                         | 7.6           | 5.14            | 5.14           | 5.14                  | 0             |
| 7450014 | LDLR  | c.1898G>A; p.Arg633His   | 1942      | Male   | E78          | I20.8 I25.8 Z95.1     | 1                             | 1                      | 205             | 92                | 2.8841                         | 5.7           | 3.35            | 3.35           | 4.79                  | 1             |
| 7450022 | PCSK9 | c.1069C>T; p.Arg357Cys   | 1984      | Female | 0            | 0                     | 0                             | 0                      | 325             | 178               | 5.0695                         | NA            | NA              | 5.07           | 5.07                  | 1             |

HC - hypercholesterolemia (reported as ICD-10 code); ASCVD - atherosclerotic cardiovascular disease (reported as ICD-10 code); EHR - electronic health records; VAP - vertical auto profile for lipid measurements; C - conventional
