# Supplementary material
Source: PubMed Central journal article supplement (PMC6752264)
Supplement: 41436_2018_311_MOESM7_ESM.pdf [file 41436_2018_311_MOESM7_ESM.pdf]

Table S5. Characteristics of all study participants.

| ID      | Proband/cascade | Gene  | Variant info             | Carrier status | Cascade participation | Modified cascade participation | Relatedness           | Age | Sex    | Pre-study diagnosis                                              | Family history of CHD* | Pre-study statin prescription | Pre-study statin use | TC mmol/L | LDL mmol/L | HDL mmol/L | TG mmol/L |
|---------|-----------------|-------|--------------------------|----------------|-----------------------|--------------------------------|-----------------------|-----|--------|------------------------------------------------------------------|------------------------|-------------------------------|----------------------|-----------|------------|------------|-----------|
| 745001  | 1               | APOB  | c.10580G>A; p.Arg3527Gln | 1              | 1                     | 1                              | NA                    | 35  | Male   | hypercholesterolemia at 22yo                                     | no                     | 1                             | 0                    | 7.4       | 5.87       | 1.61       | 0.76      |
| 7450101 | 2               |       |                          | 0              |                       |                                | mother                | 56  | Female | hypercholesterolemia at 40yo                                     | NA                     | 1                             | 0                    | 3.8       | 2.28       | 3.26       | 1.21      |
| 7450002 | 1               | APOB  | c.10580G>A; p.Arg3527Gln | 1              | 3                     | 3                              | NA                    | 54  | Male   | hypercholesterolemia at 48yo                                     | no                     | 1                             | 0                    | 5.3       | 3.81       | 5.44       | 1.07      |
| 7450102 | 2               |       |                          | 1              |                       |                                | son                   | 32  | Male   | 0                                                                | no                     | 0                             | 0                    | 8.6       | 7.03       | 1.11       | 2.48      |
| 7450003 | 1               | LDLR  | c.986G>A; p.Cys329Tyr    | 1              | 12                    | 9                              | NA                    | 48  | Female | FH suspected at 32yo                                             | yes                    | 1                             | 0                    | 5.4       | 3.12       | 4.46       | 2.02      |
| 7450103 | 2               |       |                          | 1              |                       |                                | brother               | 51  | Male   | increased TC level at 42yo                                       | yes                    | 1                             | 0                    | 6.3       | 4.88       | 6.97       | 1.27      |
| 7450203 | 2               |       |                          | 0              |                       |                                | father                | 73  | Male   | CHD; stenting                                                    | NA                     | 1                             | 0                    | 3.3       | 4.13       | 1.49       | 2.13      |
| 7450303 | 2               |       |                          | 0              |                       |                                | son                   | 18  | Male   | 0                                                                | NA                     | 0                             | 0                    | 3.4       | 2.12       | 2.12       | 1.15      |
| 7450403 | 2               |       |                          | 0              |                       |                                | son                   | 23  | Male   | 0                                                                | NA                     | 0                             | 0                    | 4.3       | 4.3        | 2.96       | 1.17      |
| 7450503 | 2               |       |                          | 0              |                       |                                | father's sister       | 71  | Female | CHD at 69yo                                                      | NA                     | 1                             | 0                    | 4.6       | 5.75       | 2.59       | 3.70      |
| 7450603 | 2               |       |                          | 0              |                       |                                | mother's sister       | 71  | Female | 0                                                                | NA                     | 1                             | 0                    | 6.4       | 8.00       | 4.24       | 6.06      |
| 7450703 | 2               |       |                          | 1              |                       |                                | daughter              | 26  | Female | hypercholesterolemia diagnosed at adolescence                    | no                     | 0                             | 0                    | 6.8       | 6.8        | 5.29       | 1.63      |
| 7450803 | 2               |       |                          | 0              |                       |                                | brother               | 43  | Male   | 0                                                                | NA                     | 0                             | 0                    | 5.4       | 5.4        | 4.08       | 1.39      |
| 7450004 | 1               | APOB  | c.10580G>A; p.Arg3527Gln | 1              | 8                     | 5                              | NA                    | 81  | Male   | MI at 46yo; recurrent MI at 75yo; hypercholesterolemia at 72yo   | no                     | 1                             | 0                    | 8.2       | 8.2        | 5.97       | 5.97      |
| 7450104 | 2               |       |                          | 1              |                       |                                | daughter              | 51  | Female | hypercholesterolemia at 36yo                                     | yes                    | 1                             | 0                    | 5.2       | 6.5        | 3.33       | 4.76      |
| 7450204 | 2               |       |                          | 1              |                       |                                | sister                | 82  | Female | stroke at 70yo; increased TC level                               | no                     | 1                             | 0                    | 6.4       | 8          | 4.84       | 6.90      |
| 7450304 | 2               |       |                          | 0              |                       |                                | daughter              | 50  | Female | 0                                                                | NA                     | 0                             | 0                    | 6.0       | 6.0        | 3.70       | 2.35      |
| 7450404 | 2               |       |                          | 0              |                       |                                | daughter's son        | 24  | Male   | 0                                                                | NA                     | 0                             | 0                    | 5.9       | 5.9        | 4.20       | 1.92      |
| 7450504 | 2               |       |                          | 1              |                       |                                | daughter's son        | 32  | Male   | 0                                                                | no                     | 0                             | 0                    | 7.8       | 7.8        | 6.39       | 1.89      |
| 7450006 | 1               | LDLR  | c.986G>A; p.Cys329Tyr    | 1              | 4                     | 1                              | NA                    | 28  | Male   | hypercholesterolemia at 14yo                                     | no                     | 1                             | 0                    | 10.9      | 10.9       | 9.21       | 9.21      |
| 7450106 | 2               |       |                          | 0              |                       |                                | mother                | 48  | Female | 0                                                                | NA                     | 0                             | 0                    | 5.8       | 5.8        | 3.85       | 3.85      |
| 7450007 | 1               | LDLR  | c.1291G>T; p.Ala431Ser   | 1              | 12                    | 10                             | NA                    | 37  | Male   | hypercholesterolemia at 32yo                                     | no                     | 1                             | 0                    | 6         | 7.5        | 4.39       | 6.27      |
| 7450107 | 2               |       |                          | 0              |                       |                                | father's sister       | 57  | Female | mild hypercholesterolemia at 56yo                                | NA                     | 0                             | 0                    | 6.4       | 6.4        | 4.43       | 4.43      |
| 7450207 | 2               |       |                          | 0              |                       |                                | father                | 66  | Male   | CHD at <50yo; CABG                                               | NA                     | 0                             | 0                    | 6.8       | 6.8        | 5.16       | 1.05      |
| 7450307 | 2               |       |                          | 1              |                       |                                | mother                | 59  | Female | hypercholesterolemia at 56yo                                     | no                     | 0                             | 0                    | 8.0       | 8.0        | 5.56       | 2.83      |
| 7450009 | 1               | APOB  | c.10580G>A; p.Arg3527Gln | 1              | 6                     | 6                              | NA                    | 54  | Male   | hypercholesterolemia at 45yo                                     | no                     | 1                             | 0                    | 8.9       | 8.9        | 6.31       | 6.31      |
| 7450109 | 2               |       |                          | 0              |                       |                                | daughter              | 31  | Female | 0                                                                | NA                     | 0                             | 0                    | 5.4       | 5.4        | 3.60       | 2.01      |
| 7450209 | 2               |       |                          | 0              |                       |                                | half-brother          | 66  | Male   | 0                                                                | NA                     | 0                             | 0                    | 6.2       | 6.2        | 4.96       | 4.96      |
| 7450309 | 2               |       |                          | 1              |                       |                                | son                   | 25  | Male   | 0                                                                | no                     | 0                             | 0                    | 5.4       | 5.4        | 3.74       | 3.74      |
| 7450409 | 2               |       |                          | 0              |                       |                                | son                   | 30  | Male   | 0                                                                | NA                     | 0                             | 0                    | 4.5       | 4.5        | 2.55       | 2.55      |
| 7450509 | 2               |       |                          | 0              |                       |                                | brother's daughter    | 27  | Female | 0                                                                | NA                     | 0                             | 0                    | 5.0       | 5.0        | 2.60       | 2.60      |
| 7450609 | 2               |       |                          | 0              |                       |                                | brother's son         | 29  | Male   | 0                                                                | NA                     | 0                             | 0                    | 4.4       | 4.4        | 2.76       | 2.76      |
| 7450013 | 1               | LDLR  | c.343C>T; p.Arg115Cys    | 1              | 5                     | 5                              | NA                    | 33  | Female | 0                                                                | no                     | 0                             | 0                    | 5.5       | 5.5        | 3.72       | 3.72      |
| 7450113 | 2               |       |                          | 1              |                       |                                | brother               | 26  | Male   | 0                                                                | no                     | 0                             | 0                    | 4.1       | 4.1        | 3.22       | 3.22      |
| 7450213 | 1               |       |                          | 0              |                       |                                | mother's brother      | 62  | Male   | 0                                                                | NA                     | 0                             | 0                    | 6.4       | 6.4        | 4.52       | 4.52      |
| 7450313 | 2               |       |                          | 0              |                       |                                | mother's twin brother | 59  | Male   | 0                                                                | NA                     | 0                             | 0                    | 5.8       | 5.8        | 3.62       | 3.62      |
| 7450413 | 2               |       |                          | 1              |                       |                                | father                | 59  | Male   | 0                                                                | no                     | 0                             | 0                    | 6.8       | 6.8        | 5.22       | 5.22      |
| 7450513 | 2               |       |                          | 0              |                       |                                | mother                | 59  | Female | 0                                                                | NA                     | 0                             | 0                    | 6.7       | 6.7        | 4.60       | 4.60      |
| 7450014 | 1               | LDLR  | c.1898G>A; p.Arg633His   | 1              | 15                    | 10                             | NA                    | 74  | Male   | hypercholesterolemia at 61yo; CHD; stenting                      | no                     | 1                             | 0                    | 4.2       | 5.25       | 2.72       | 3.89      |
| 7450114 | 2               |       |                          | 0              |                       |                                | sister's daughter     | 36  | Female | 0                                                                | NA                     | 0                             | 0                    | 4.6       | 4.6        | 3.23       | 3.23      |
| 7450214 | 2               |       |                          | 0              |                       |                                | sister                | 59  | Female | hypercholesterolemia at 35yo                                     | NA                     | 0                             | 0                    | 4.5       | 4.5        | 2.70       | 1.92      |
| 7450314 | 2               |       |                          | 0              |                       |                                | sister's daughter     | 37  | Female | 0                                                                | NA                     | 0                             | 0                    | 5.2       | 5.2        | 3.71       | 3.71      |
| 7450414 | 2               |       |                          | 0              |                       |                                | sister                | 76  | Female | angina pectoris at 60yo                                          | NA                     | 1                             | 0                    | 3.9       | 4.875      | 1.80       | 2.57      |
| 7450514 | 2               |       |                          | 1              |                       |                                | sister's daughter     | 33  | Female | 0                                                                | NA                     | 0                             | 0                    | 4.9       | 4.9        | 3.58       | 3.58      |
| 7450614 | 2               |       |                          | 1              |                       |                                | son                   | 48  | Male   | 0                                                                | no                     | 0                             | 0                    | 5.8       | 5.8        | 4.08       | 4.08      |
| 7450015 | 1               | APOB  | c.10580G>A; p.Arg3527Gln | 1              | 7                     | 7                              | NA                    | 47  | Female | hypercholesterolemia at 36yo                                     | no                     | 1                             | 0                    | 4.7       | 6.7        | 2.82       | 4.03      |
| 7450115 | 2               |       |                          | 1              |                       |                                | sister's daughter     | 27  | Female | 0                                                                | no                     | 0                             | 0                    | 6.0       | 6.0        | 4.87       | 4.87      |
| 7450215 | 2               |       |                          | 1              |                       |                                | daughter              | 50  | Female | hypercholesterolemia and hypertension at 40yo                    | no                     | 1                             | 0                    | 6.0       | 7.5        | 4.33       | 6.19      |
| 7450315 | 2               |       |                          | 1              |                       |                                | sister                | 25  | Female | 0                                                                | no                     | 0                             | 0                    | 6.3       | 6.3        | 4.27       | 4.27      |
| 7450016 | 1               | APOB  | c.10580G>A; p.Arg3527Gln | 1              | 17                    | 7                              | NA                    | 78  | Female | hypercholesterolemia at 68yo (arcus cornealis)                   | yes                    | 1                             | 0                    | 8.0       | 11.43      | 6.37       | 9.1       |
| 7450116 | 2               |       |                          | 1              |                       |                                | brother               | 77  | Male   | hypercholesterolemia (arcus cornealis); hypertension at 59yo     | yes                    | 1                             | 0                    | 5.3       | 6.625      | 4.19       | 5.99      |
| 7450216 | 2               |       |                          | 1              |                       |                                | daughter              | 55  | Female | 0                                                                | no                     | 0                             | 0                    | 13.6      | 13.6       | 11.56      | 11.56     |
| 7450316 | 2               |       |                          | 0              |                       |                                | brother's son         | 28  | Male   | 0                                                                | NA                     | 0                             | 0                    | 4.4       | 4.4        | 2.98       | 2.98      |
| 7450416 | 2               |       |                          | 0              |                       |                                | brother's daughter    | 30  | Female | 0                                                                | NA                     | 0                             | 0                    | 6.4       | 6.4        | 4.90       | 4.90      |
| 7450516 | 2               |       |                          | 0              |                       |                                | brother's son         | 44  | Male   | 0                                                                | NA                     | 0                             | 0                    | 5.5       | 5.5        | 3.50       | 3.50      |
| 7450018 | 1               | APOB  | c.10580G>A; p.Arg3527Gln | 1              | 12                    | 5                              | NA                    | 54  | Female | FH suspected at 45yo                                             | no                     | 0                             | 0                    | 11.0      | 11.0       | 9.08       | 9.08      |
| 7450118 | 2               |       |                          | 0              |                       |                                | brother's daughter    | 34  | Female | 0                                                                | NA                     | 0                             | 0                    | 4.6       | 4.6        | 3.33       | 3.33      |
| 7450218 | 2               |       |                          | 0              |                       |                                | daughter              | 31  | Female | 0                                                                | NA                     | 0                             | 0                    | 6.0       | 6.0        | 4.03       | 4.03      |
| 7450019 | 1               | LDLR  | c.986G>A; p.Cys329Tyr    | 1              | 8                     | 7                              | NA                    | 54  | Female | hypercholesterolemia at 35yo                                     | yes                    | 1                             | 0                    | 7.9       | 11.29      | 4.03       | 5.76      |
| 7450119 | 2               |       |                          | 0              |                       |                                | son                   | 31  | Male   | 0                                                                | NA                     | 0                             | 0                    | 5.6       | 5.6        | 3.27       | 3.27      |
| 7450219 | 2               |       |                          | 0              |                       |                                | father's sister       | 72  | Female | 0                                                                | NA                     | 1                             | 0                    | 5.1       | 6.38       | 3.06       | 4.37      |
| 7450319 | 2               |       |                          | 0              |                       |                                | father's sister       | 67  | Female | stroke at 60yo                                                   | NA                     | 1                             | 0                    | 4.7       | 5.91       | 2.51       | 3.59      |
| 7450419 | 2               |       |                          | 0              |                       |                                | brother's son         | 35  | Male   | 0                                                                | NA                     | 0                             | 0                    | 5.0       | 5.03       | 3.36       | 3.36      |
| 7450519 | 2               |       |                          | 0              |                       |                                | brother's son         | 26  | Male   | 0                                                                | NA                     | 0                             | 0                    | 3.9       | 3.87       | 2.09       | 2.09      |
| 7450619 | 2               |       |                          | 0              |                       |                                | brother's son         | 28  | Male   | 0                                                                | NA                     | 0                             | 0                    | 4.3       | 4.3        | 2.70       | 2.70      |
| 7450719 | 2               |       |                          | 0              |                       |                                | son                   | 59  | Male   | MI at 48yo                                                       | NA                     | 1                             | 0                    | 4.8       | 6.00       | 4.27       | 4.17      |
| 7450020 | 1               | LDLR  | c.1187G>C; p.Gly396Ala   | 1              | 8                     | 7                              | NA                    | 39  | Male   | 0                                                                | no                     | 0                             | 0                    | 6.1       | 6.1        | 4.41       | 4.41      |
| 7450120 | 2               |       |                          | 0              |                       |                                | half-sister           | 32  | Female | 0                                                                | NA                     | 0                             | 0                    | 5.8       | 5.8        | 3.48       | 3.48      |
| 7450220 | 2               |       |                          | 1              |                       |                                | mother's sister       | 57  | Female | MI at 53yo; angina pectoris 52yo; hypercholesterolemia suspected | no                     | 0                             | 0                    | 8.2       | 8.2        | 5.77       | 5.77      |
| 7450320 | 2               |       |                          | 0              |                       |                                | mother's sister       | 50  | Female | 0                                                                | NA                     | 0                             | 0                    | 6.0       | 6.02       | 3.96       | 3.96      |
| 7450420 | 2               |       |                          | 1              |                       |                                | mother                | 61  | Female | 0                                                                | no                     | 0                             | 0                    | 5.8       | 5.8        | 4.20       | 4.20      |
| 7450520 | 2               |       |                          | 0              |                       |                                | mother's brother      | 68  | Male   | 0                                                                | NA                     | 0                             | 0                    | 6.3       | 6.3        | 4.55       | 4.55      |
| 7450022 | 1               | PCSK9 | c.1069C>T; p.Arg357Cys   | 1              | 8                     | 4                              | NA                    | 32  | Female | 0                                                                | no                     | 0                             | 0                    | 7.5       | 7.5        | 5.06       | 5.06      |
| 7450122 | 2               |       |                          | 0              |                       |                                | mother                | 67  | Female | 0                                                                | NA                     | 0                             | 0                    | 7.2       | 7.2        | 5.65       | 5.65      |
| 7450222 | 2               |       |                          | 0              |                       |                                | brother               | 37  | Male   | 0                                                                | NA                     | 0                             | 0                    | 5.4       | 5.4        | 3.88       | 3.88      |
| 7450322 | 2               |       |                          | 0              |                       |                                | half-brother          | 53  | Male   | 0                                                                | NA                     | 0                             | 0                    | 5.9       | 5.9        | 4.52       | 4.52      |
| 7450422 | 2               |       |                          | 0              |                       |                                | brother               | 39  | Male   | 0                                                                | NA                     | 0                             | 0                    | 4.9       | 4.9        | 3.35       | 3.35      |
| 7450023 | 1               | APOB  | c.10580G>A; p.Arg3527Gln | 1              | 4                     | 3                              | NA                    | 41  | Female | hypercholesterolemia at 32yo                                     | no                     | 0                             | 0                    | 7.2       | 7.2        | 5.22       | 5.22      |
| 7450025 | 1               | APOB  | c.10580G>A; p.Arg3527Gln | 1              | 0                     | 0                              | NA                    | 32  | Female | FH suspected at 23yo                                             | no                     | 1                             | 0                    | 12.7      | 12.7       | 10.41      | 10.41     |
| 7450026 | 1               | LD    |                          |                |                       |                                |                       |     |        |                                                                  |                        |                               |                      |           |            |            |           |

| ID      | CAc (Agatston score)              | exercise ECG            | carotid ultrasound: average IMT (mm); presence of plaque | Imaging results       | DLCN FH score | Post-study statin                    | Final diagnosis      |
|---------|-----------------------------------|-------------------------|----------------------------------------------------------|-----------------------|---------------|--------------------------------------|----------------------|
| 7450001 | LAD 8                             | no ischemia             | 0.8                                                      | sub-clinical ASCVD    | 11            | atorvastatin 10mg                    | FH                   |
| 7450101 | NA                                | NA                      | NA                                                       | NA                    | NA            | NA                                   | NA                   |
| 7450002 | LCX 8, RCA 83                     | ischemia suspected      | NA                                                       | sub-clinical ASCVD    | 13            | rosuvastatin 10mg                    | FH                   |
| 7450102 | 0                                 | no ischemia             | 0.9                                                      | no sub-clinical ASCVD | 14            | not prescribed due to liver problems | FH                   |
| 7450003 | LAD 13, LCX 4                     | no ischemia             | 0.72                                                     | sub-clinical ASCVD    | 15            | rosuvastatin 20mg                    | FH                   |
| 7450103 | 589 (RCA, LAD, LCX)               | no ischemia             | 1.7                                                      | sub-clinical ASCVD    | 9             | rosuvastatin 40mg; ezetimibe 10mg    | FH                   |
| 7450203 | NA                                | NA                      | NA                                                       | NA                    | NA            | NA                                   | NA                   |
| 7450303 | NA                                | NA                      | NA                                                       | NA                    | NA            | NA                                   | NA                   |
| 7450403 | NA                                | NA                      | NA                                                       | NA                    | NA            | NA                                   | NA                   |
| 7450503 | NA                                | NA                      | NA                                                       | NA                    | NA            | NA                                   | NA                   |
| 7450603 | NA                                | NA                      | NA                                                       | NA                    | NA            | NA                                   | NA                   |
| 7450703 | NA (declined)                     | no ischemia             | 0.47                                                     | declined              | 12            | not prescribed, pregnant             | FH                   |
| 7450803 | NA                                | NA                      | NA                                                       | NA                    | NA            | NA                                   | NA                   |
| 7450004 | NA (disease manifested)           | NA (disease manifested) | NA (disease manifested)                                  | prevalent ASCVD       | 13            | rosuvastatin 10mg                    | FH                   |
| 7450104 | 0                                 | no ischemia             | 0.7                                                      | no sub-clinical ASCVD | 9             | atorvastatin 60mg                    | FH                   |
| 7450204 | NA (disease manifested)           | NA (disease manifested) | NA (disease manifested)                                  | prevalent ASCVD       | 14            | atorvastatin 20mg                    | FH                   |
| 7450304 | NA                                | NA                      | NA                                                       | NA                    | NA            | NA                                   | NA                   |
| 7450404 | NA                                | NA                      | NA                                                       | NA                    | NA            | NA                                   | NA                   |
| 7450504 | 0                                 | no ischemia             | 0.6                                                      | no sub-clinical ASCVD | 12            | atorvastatin 20mg                    | FH                   |
| 7450006 | 25 LAD                            | no ischemia             | 0.8                                                      | sub-clinical ASCVD    | 16            | atorvastatin 40mg                    | FH                   |
| 7450106 | NA                                | NA                      | NA                                                       | NA                    | NA            | NA                                   | NA                   |
| 7450007 | LAD 41, LCX 10, RCA 234           | no ischemia             | 0.7                                                      | sub-clinical ASCVD    | 3             | atorvastatin 20mg                    | FH                   |
| 7450107 | NA                                | NA                      | NA                                                       | NA                    | NA            | NA                                   | NA                   |
| 7450207 | NA                                | NA                      | NA                                                       | NA                    | NA            | NA                                   | NA                   |
| 7450307 | LM 14, LAD 83, LCX 5, RCA 125     | no ischemia             | 1.2                                                      | sub-clinical ASCVD    | 4             | rosuvastatin 10mg                    | FH                   |
| 7450009 | LAD 120, LCX 157, RCA 225         | no ischemia             | 1; plaque in carotid artery                              | sub-clinical ASCVD    | 11            | atorvastatin 20mg                    | FH                   |
| 7450109 | NA                                | NA                      | NA                                                       | NA                    | NA            | NA                                   | NA                   |
| 7450209 | NA                                | NA                      | NA                                                       | NA                    | NA            | NA                                   | NA                   |
| 7450309 | 0                                 | no ischemia             | 0.58                                                     | no sub-clinical ASCVD | 9             | not prescribed                       | FH                   |
| 7450409 | NA                                | NA                      | NA                                                       | NA                    | NA            | NA                                   | NA                   |
| 7450509 | NA                                | NA                      | NA                                                       | NA                    | NA            | NA                                   | NA                   |
| 7450609 | NA                                | NA                      | NA                                                       | NA                    | NA            | NA                                   | NA                   |
| 7450013 | 0                                 | no ischemia             | 0.5                                                      | no sub-clinical ASCVD | 0             | not prescribed                       | hypercholesterolemia |
| 7450113 | 0                                 | no ischemia             | 0.55                                                     | no sub-clinical ASCVD | 0             | not prescribed                       | NA                   |
| 7450213 | NA                                | NA                      | NA                                                       | NA                    | NA            | NA                                   | NA                   |
| 7450313 | NA                                | NA                      | NA                                                       | NA                    | NA            | NA                                   | NA                   |
| 7450413 | 15.6                              | no ischemia             | 1.1                                                      | sub-clinical ASCVD    | 4             | not prescribed                       | NA                   |
| 7450513 | NA                                | NA                      | NA                                                       | NA                    | NA            | NA                                   | NA                   |
| 7450014 | NA (disease manifested)           | NA (disease manifested) | NA (disease manifested)                                  | prevalent ASCVD       | 13            | rosuvastatin 20mg                    | FH                   |
| 7450114 | NA                                | NA                      | NA                                                       | NA                    | NA            | NA                                   | NA                   |
| 7450214 | NA                                | NA                      | NA                                                       | NA                    | NA            | NA                                   | NA                   |
| 7450314 | NA                                | NA                      | NA                                                       | NA                    | NA            | NA                                   | NA                   |
| 7450414 | NA                                | NA                      | NA                                                       | NA                    | NA            | NA                                   | NA                   |
| 7450514 | NA                                | NA                      | NA                                                       | NA                    | NA            | NA                                   | NA                   |
| 7450614 | 0                                 | no ischemia             | 1                                                        | no sub-clinical ASCVD | 10            | rosuvastatin 10mg                    | FH                   |
| 7450015 | 0                                 | no ischemia             | 0.9                                                      | no sub-clinical ASCVD | 14            | rosuvastatin 10mg                    | FH                   |
| 7450115 | 0                                 | no ischemia             | 0.58                                                     | no sub-clinical ASCVD | 9             | not prescribed, contraindications    | FH                   |
| 7450215 | LAD 5                             | no ischemia             | 0.57                                                     | sub-clinical ASCVD    | 14            | rosuvastatin 20mg                    | FH                   |
| 7450315 | 0                                 | no ischemia             | 0.6                                                      | no sub-clinical ASCVD | 9             | not prescribed, contraindications    | FH                   |
| 7450016 | NA (declined)                     | no ischemia             | 1.2                                                      | declined              | 17            | rosuvastatin 40mg; ezetimibe 10mg    | FH                   |
| 7450116 | LMA 107, LAD 957, LCX 286, RCA 39 | no ischemia             | 1.18; plaque in carotid artery                           | sub-clinical ASCVD    | 14            | rosuvastatin 20mg                    | FH                   |
| 7450216 | 686                               | no ischemia             | 0.7                                                      | sub-clinical ASCVD    | 17            | rosuvastatin 20mg                    | FH                   |
| 7450316 | NA                                | NA                      | NA                                                       | NA                    | NA            | NA                                   | NA                   |
| 7450416 | NA                                | NA                      | NA                                                       | NA                    | NA            | NA                                   | NA                   |
| 7450516 | NA                                | NA                      | NA                                                       | NA                    | NA            | NA                                   | NA                   |
| 7450018 | 0.4                               | no ischemia             | 1.3; plaque in carotid artery                            | sub-clinical ASCVD    | 17            | rosuvastatin 20mg                    | FH                   |
| 7450118 | NA                                | NA                      | NA                                                       | NA                    | NA            | NA                                   | NA                   |
| 7450218 | NA                                | NA                      | NA                                                       | NA                    | NA            | NA                                   | NA                   |
| 7450019 | 1580                              | no ischemia             | 0.95                                                     | sub-clinical ASCVD    | 9             | rosuvastatin 40mg                    | FH                   |
| 7450119 | NA                                | NA                      | NA                                                       | NA                    | NA            | NA                                   | NA                   |
| 7450219 | NA                                | NA                      | NA                                                       | NA                    | NA            | NA                                   | NA                   |
| 7450319 | NA                                | NA                      | NA                                                       | NA                    | NA            | NA                                   | NA                   |
| 7450419 | NA                                | NA                      | NA                                                       | NA                    | NA            | NA                                   | NA                   |
| 7450519 | NA                                | NA                      | NA                                                       | NA                    | NA            | NA                                   | NA                   |
| 7450619 | NA                                | NA                      | NA                                                       | NA                    | NA            | NA                                   | NA                   |
| 7450719 | NA                                | NA                      | NA                                                       | NA                    | NA            | NA                                   | NA                   |
| 7450020 | 0                                 | no ischemia             | 1                                                        | no sub-clinical ASCVD | 1             | not prescribed                       | FH                   |
| 7450120 | NA                                | NA                      | NA                                                       | NA                    | NA            | NA                                   | NA                   |
| 7450220 | NA (disease manifested)           | NA (disease manifested) | NA (disease manifested)                                  | prevalent ASCVD       | 5             | not prescribed due to liver problems | FH                   |
| 7450320 | NA                                | NA                      | NA                                                       | NA                    | NA            | NA                                   | NA                   |
| 7450420 | LAD 8, LCX 2, RCA 5               | hypertension suspected  | 1.12; plaque in carotid artery                           | sub-clinical ASCVD    | 2             | atorvastatin 20mg                    | FH                   |
| 7450520 | NA                                | NA                      | NA                                                       | NA                    | NA            | NA                                   | NA                   |
| 7450022 | 8.4                               | no ischemia             | 0.7                                                      | sub-clinical ASCVD    | 4             | not prescribed, declined             | FH                   |
| 7450122 | NA                                | NA                      | NA                                                       | NA                    | 5             | NA                                   | NA                   |
| 7450222 | NA                                | NA                      | NA                                                       | NA                    | NA            | NA                                   | NA                   |
| 7450322 | NA                                | NA                      | NA                                                       | NA                    | NA            | NA                                   | NA                   |
| 7450422 | NA                                | NA                      | NA                                                       | NA                    | NA            | NA                                   | NA                   |
| 7450023 | 0                                 | no ischemia             | 0.9                                                      | no sub-clinical ASCVD | 12            | atorvastatin 20mg                    | FH                   |
| 7450025 | NA (breastfeeding)                | no ischemia             | 0.9                                                      | declined              | 17            | not prescribed, breastfeeding        | FH                   |
| 7450026 | 2082                              | no ischemia             | 1.2                                                      | sub-clinical ASCVD    | 9             | rosuvastatin 20mg                    | FH                   |
| 7450126 | 0                                 | no ischemia             | 0.75                                                     | no sub-clinical ASCVD | 10            | not prescribed, declined             | FH                   |
| 7450226 | 0                                 | no ischemia             | 0.77; plaque in carotid artery                           | sub-clinical ASCVD    | 12            | rosuvastatin 10mg                    | FH                   |
| 7450028 | 17.3                              | no ischemia             | 0.8                                                      | sub-clinical ASCVD    | 14            | atorvastatin 40mg                    | FH                   |
| 7450029 | LAD 17, RCA 1                     | no ischemia             | 0.8                                                      | sub-clinical ASCVD    | 12            | atorvastatin 10mg                    | FH                   |
| 7450032 | 0                                 | no ischemia             | 0.72                                                     | no sub-clinical ASCVD | 0             | not prescribed                       | hypercholesterolemia |

terolemia score
