# Supplementary material
Source: PubMed Central journal article supplement (PMC6752264)
Supplement: 41436_2018_311_MOESM8_ESM.pdf [file 41436_2018_311_MOESM8_ESM.pdf]

Table S6. Transcript info of FH-associated genes.

| Gene         | Transcript ID   | RefSeq Transcript ID |
|--------------|-----------------|----------------------|
| <i>APOB</i>  | ENST00000233242 | NM_000527            |
| <i>LDLR</i>  | ENST00000558518 | NM_174936            |
| <i>PCSK9</i> | ENST00000302118 | NM_000384            |
